# Supplementary material
Source: PubMed Central journal article supplement (PMC2888561)

## Supplementary data

**Supplementary Table S1.** Details of amino acid sequences used in the phylogenetic and rate-shift analyses.

**Supplementary Fig. S1.** A. Nucleotide sequence alignment of 8 salmonid *akirin1(1)* family members that could not be split into two monophyletic clades using phylogenetic analysis with amino acid sequences (see Fig. 1, discussed in main article). Sites underlined in red font highlight fixed substitutions and indels, which demarcate the sequences into two distinct family members inherited from a common ancestor. B. Neighbour joining tree produced using nucleotide data excluding *akirin2* sequences splits salmonid *akirin1(1)* family members into two monophyletic clades representing two paralogues. Details of sequences used are in Supplementary Table S1.

**Supplementary Fig. S2.** Matrix of Pearson's R-values, demonstrating the strength and direction of linear relationships in transcript abundances between the 28 non-reference genes measured across the experimental model altering nutritional state in Arctic charr skeletal muscle. Values highlighted in bold blue and red font represent R-values exceeding 0.7 and 0.8 respectively.

Supplementary Table S1. Details of amino acid sequences used for phylogenetic and rate-shift analyses

| Common name              | Species                       | Gene               | NCBI Accession number | Ensembl Identifier | Size (amino acids), status <sup>1</sup> | Chromosomal location |
|--------------------------|-------------------------------|--------------------|-----------------------|--------------------|-----------------------------------------|----------------------|
| Arctic charr             | <i>Salvelinus alpinus</i>     | <i>akirin1(1a)</i> | GQ247756              | N/A                | 187, complete                           | N/A                  |
|                          |                               | <i>akirin1(1b)</i> | GQ247757              | N/A                | 186, complete                           | N/A                  |
|                          |                               | <i>akirin1(2a)</i> | GQ247758              | N/A                | 187, complete                           | N/A                  |
|                          |                               | <i>akirin1(2b)</i> | GQ247759              | N/A                | 181, complete                           | N/A                  |
|                          |                               | <i>akirin2(1a)</i> | GQ247760              | N/A                | 184, complete                           | N/A                  |
|                          |                               | <i>akirin2(1b)</i> | GQ247761              | N/A                | 184, complete                           | N/A                  |
|                          |                               | <i>akirin2(2a)</i> | GQ247762              | N/A                | 181, complete                           | N/A                  |
|                          |                               | <i>akirin2(2b)</i> | GQ247763              | N/A                | 180, complete                           | N/A                  |
| Atlantic salmon          | <i>Salmo salar</i>            | <i>akirin1(1a)</i> | GQ247764              | N/A                | 187, complete                           | N/A                  |
|                          |                               | <i>akirin1(1b)</i> | GQ247765              | N/A                | 186, complete                           | N/A                  |
|                          |                               | <i>akirin1(2a)</i> | GQ247766              | N/A                | 187, complete                           | N/A                  |
|                          |                               | <i>akirin1(2b)</i> | GQ247767              | N/A                | 187, complete                           | N/A                  |
|                          |                               | <i>akirin2(1a)</i> | GQ247768              | N/A                | 184, complete                           | N/A                  |
|                          |                               | <i>akirin2(1b)</i> | GQ247769              | N/A                | 184, complete                           | N/A                  |
|                          |                               | <i>akirin2(2a)</i> | GQ247770              | N/A                | 181, complete                           | N/A                  |
|                          |                               | <i>akirin2(2b)</i> | GQ247771              | N/A                | 180, complete                           | N/A                  |
| Brown trout              | <i>Salmo trutta</i>           | <i>akirin1(1a)</i> | GQ247772              | N/A                | 187, complete                           | N/A                  |
|                          |                               | <i>akirin1(1b)</i> | GQ247773              | N/A                | 186, complete                           | N/A                  |
|                          |                               | <i>akirin1(2a)</i> | GQ247774              | N/A                | 187, complete                           | N/A                  |
|                          |                               | <i>akirin1(2b)</i> | GQ247775              | N/A                | 187, complete                           | N/A                  |
|                          |                               | <i>akirin2(1a)</i> | GQ247776              | N/A                | 184, complete                           | N/A                  |
|                          |                               | <i>akirin2(1b)</i> | GQ247777              | N/A                | 184, complete                           | N/A                  |
|                          |                               | <i>akirin2(2a)</i> | GQ247778              | N/A                | 181, complete                           | N/A                  |
|                          |                               | <i>akirin2(2b)</i> | GQ247779              | N/A                | 180, complete                           | N/A                  |
| Rainbow trout            | <i>Oncorhynchus mykiss</i>    | <i>akirin1(1a)</i> | GQ247780              | N/A                | 187, complete                           | N/A                  |
|                          |                               | <i>akirin1(1b)</i> | GQ247781              | N/A                | 186, complete                           | N/A                  |
|                          |                               | <i>akirin1(2a)</i> | GQ247782              | N/A                | 191, complete                           | N/A                  |
|                          |                               | <i>akirin1(2b)</i> | GQ247783              | N/A                | 187, complete                           | N/A                  |
|                          |                               | <i>akirin2(1a)</i> | GQ247784              | N/A                | 184, complete                           | N/A                  |
|                          |                               | <i>akirin2(1b)</i> | GQ247785              | N/A                | 180, complete                           | N/A                  |
|                          |                               | <i>akirin2(2a)</i> | GQ247786              | N/A                | 178, complete                           | N/A                  |
|                          |                               | <i>akirin2(2b)</i> | GQ247787              | N/A                | 180, complete                           | N/A                  |
| Common roach             | <i>Rutilus rutilus</i>        | <i>akirin1(1)</i>  | EG540958              | N/A                | 188, complete                           | N/A                  |
|                          |                               | <i>akirin2(1)</i>  | EG546460              | N/A                | 162, partial                            | N/A                  |
| Zebrafish                | <i>Danio rerio</i>            | <i>akirin1(1)</i>  | NM_001007186          | ENSDARG0000003996  | 188, complete                           | Chr 16               |
|                          |                               | <i>akirin2(1)</i>  | BC065319              | ENSDARG00000058729 | 180, complete                           | Chr 20               |
| Fathead minnow           | <i>Pimephales promelas</i>    | <i>akirin1(1)</i>  | DT245087              | N/A                | 188, complete                           | N/A                  |
|                          |                               | <i>akirin2(1)</i>  | DT344888              | N/A                | 178, complete                           | N/A                  |
| Blue catfish             | <i>Ictalurus furcatus</i>     | <i>akirin2(2)</i>  | FD160843              | N/A                | 162, partial                            | N/A                  |
| Channel catfish          | <i>Ictalurus punctatus</i>    | <i>akirin2(2)</i>  | FD344768              | N/A                | 188, complete                           | N/A                  |
| Atlantic cod             | <i>Gadus morhua</i>           | <i>akirin2(1)</i>  | EX736334              | N/A                | 186, complete                           | N/A                  |
|                          |                               | <i>akirin2(2)</i>  | ES470970              | N/A                | 180, complete                           | N/A                  |
| Three-spined stickleback | <i>Gasterosteus aculeatus</i> | <i>akirin1(1)</i>  | N/A                   | ENSGACG00000013657 | 188, complete                           | Group 20             |
|                          |                               | <i>akirin2(1)</i>  | N/A                   | ENSGACG00000008247 | 180, complete                           | Group 18             |
|                          |                               | <i>akirin2(2)</i>  | N/A                   | ENSGACG00000009179 | 185, complete                           | Group 15             |
| Japanese medaka          | <i>Oryzias latipes</i>        | <i>akirin1(1)</i>  | N/A                   | ENSORLG00000014770 | 187, complete                           | Chr 16               |
|                          |                               | <i>akirin2(1)</i>  | N/A                   | ENSORLG00000011455 | 180, complete                           | Chr 24               |
|                          |                               | <i>akirin2(2)</i>  | N/A                   | ENSORLG00000014760 | 181, complete                           | Chr 22               |

Supplementary Table S1. Continued.

| Common name         | Species                              | Gene              | NCBI Accession number | Ensembl Identifier | Size (amino acids), status <sup>1</sup> | Chromosomal location |
|---------------------|--------------------------------------|-------------------|-----------------------|--------------------|-----------------------------------------|----------------------|
| Tiger pufferfish    | <i>Takifugu rubripes</i>             | <i>akirin2(1)</i> | N/A                   | ENSTRUG00000017799 | 183, complete                           | scaffold_94          |
|                     |                                      | <i>akirin2(2)</i> | N/A                   | ENSTRUG00000006920 | 186, complete                           | scaffold_10          |
| Human               | <i>Homo sapiens</i>                  | <i>akirin1</i>    | NM_024595             | ENSG00000174574    | 192, complete                           | Chr 1                |
|                     |                                      | <i>akirin2</i>    | NM_018064             | ENSG00000135334    | 204, complete                           | Chr 6                |
| Mouse               | <i>Mus musculus</i>                  | <i>akirin1</i>    | NM_023423             | ENSMUSG00000023075 | 192, complete                           | Chr 4                |
|                     |                                      | <i>akirin2</i>    | NM_00100758           | ENSMUSG00000028291 | 202, complete                           | Chr 4                |
| Chicken             | <i>Gallus gallus</i>                 | <i>akirin2</i>    | BX934526              | ENSGALG00000015791 | 190, complete                           | Chr 3                |
| Zebra finch         | <i>Taeniopygia guttata</i>           | <i>akirin2</i>    | DQ213345              | ENSTGUG00000012437 | 194, complete                           | Chr 3                |
| Western clawed frog | <i>Xenopus tropicalis</i>            | <i>akirin1</i>    | BC090594              | ENSXETG00000005271 | 187, complete                           | scaffold_76          |
|                     |                                      | <i>akirin2</i>    | NM_203583             | ENSXETG00000019800 |                                         |                      |
| Sea pineapple       | <i>Halocynthia roretzi</i>           | <i>akirin</i>     | DB608126              | N/A                | 212, complete                           | N/A                  |
| Florida lancelet    | <i>Branchiostoma floridae</i>        | <i>akirin</i>     | XM_002223114          | N/A                | 216, complete                           | N/A                  |
| Purple sea urchin   | <i>Strongylocentrotus purpuratus</i> | <i>akirin</i>     | XM_001182037          | N/A                | 212, complete                           | N/A                  |

<sup>1</sup> informs the reader the size of the protein sequence and whether it is complete (i.e. has a stop and start codon)



**A**

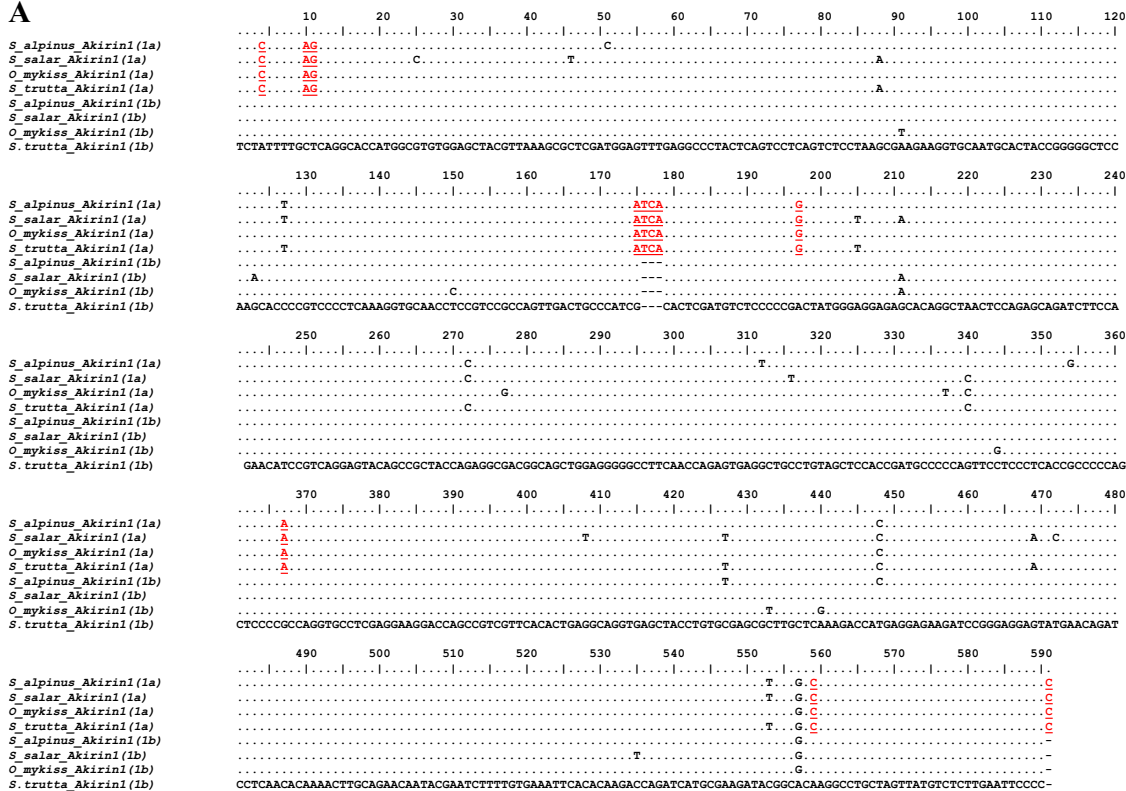

**B**

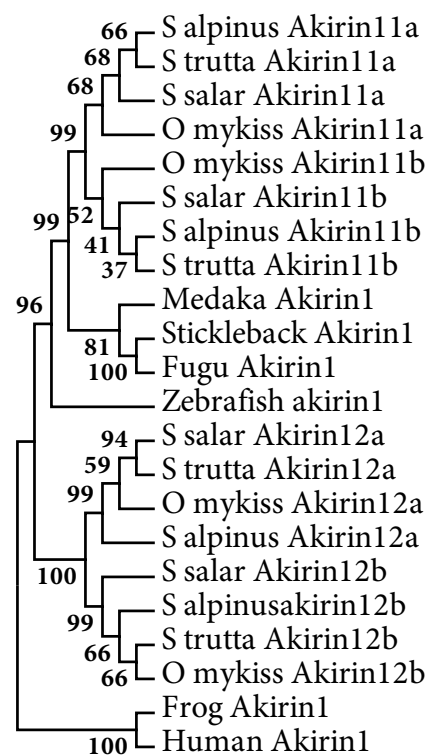

Supplement: 00045.2010_1.pdf [file 00045.2010_1.pdf]
